# Supplementary material for: Translation of the Debriefing Assessment for Simulation in Healthcare in Portuguese and cross-cultural adaptation for Portugal and Brazil
Source: PubMed Central journal article supplement (PMC8265112; doi:10.1186/s41077-021-00175-z), 2021-07-07
Supplement: 41077_2021_175_MOESM1_ESM.pdf [file 41077_2021_175_MOESM1_ESM.pdf]

# DASH - *Debriefing Assessment for Simulation in Healthcare*©

## Avaliação do *Debriefing* em Simulação Clínica – Classificação

**Instruções:** Classifique a qualidade do *debriefing* utilizando escalas de eficácia com seis Elementos. O Elemento 1 classifica a introdução da atividade de simulação e não será classificado se não observou a introdução. Os Elementos abrangem Dimensões e Comportamentos pertinentes para o *debriefing* como definido no “Manual do Avaliador do DASH”. Em cada Elemento, o *debriefing* pode variar de Excelente a Prejudicial. Repare que a classificação geral dos Elementos **não** é a média das classificações para cada Dimensão ou Comportamento. Pense de formal global e não matematicamente quando considera o impacto das Dimensões, que podem não ter o mesmo peso. O avaliador deve ponderar as Dimensões da forma mais adequada, baseado na **visão global do Elemento**. Se não for possível avaliar uma Dimensão (ex: como se lidou com um participante descontente, se ninguém ficou descontente), ignore e não permita que isso influencie a sua avaliação.

### Escala de Pontuação

| Classificação | 1                                                    | 2                                                            | 3                          | 4                            | 5                      | 6                                    | 7                                |
|---------------|------------------------------------------------------|--------------------------------------------------------------|----------------------------|------------------------------|------------------------|--------------------------------------|----------------------------------|
| Descrição     | Extremamente ineficaz<br>Extremamente insatisfatório | Consistentemente ineficaz<br>Consistentemente insatisfatório | Ineficaz<br>Insatisfatório | Pouco eficaz<br>Satisfatório | Bastante eficaz<br>Bom | Consistentemente eficaz<br>Muito Bom | Extremamente eficaz<br>Excelente |

### O Elemento 1 avalia a introdução no início de um exercício de simulação.

(Este Elemento deve ser ignorado se o avaliador não observou a introdução do curso.)

#### Elemento 1

Classificação Elemento 1

**Estabelece um ambiente envolvente de aprendizagem.**

- Esclarece todas as questões relacionadas com os objetivos da atividade, ambiente, confidencialidade, papéis e expectativas.
- Estabelece um “contrato de ficção” com os participantes.
- Esclarece detalhes logísticos.
- Define o compromisso de respeitar os participantes e compreender as suas perspectivas.

### Os Elementos 2 a 6 avaliam o debriefing.

#### Elemento 2

Classificação Elemento 2

**Mantém um ambiente envolvente para a aprendizagem.**

- Esclarece os objetivos, papéis e expectativas do *debriefing*.
- Ajuda os participantes a envolverem-se num contexto de realismo limitado.
- Mostra respeito pelos participantes e preocupa-se com a sua segurança psicológica.

#### Elemento 3

Classificação Elemento 3

**Estrutura o debriefing de forma organizada.**

- Encoraja os participantes a partilhar as suas reações e, se necessário, orienta a sucessão de eventos do exercício.
- Orienta a análise do desempenho dos participantes durante o *debriefing*.
- Colabora com os participantes no resumo da aprendizagem da sessão que termina.

**Elemento 4****Classificação Elemento 4****Incentiva discussões profundas.**

- Usa exemplos e resultados concretos como base para os seus comentários e discussão.
- Revela o seu raciocínio e opinião.
- Facilita a discussão com técnicas de linguagem verbal e não verbal.
- Usa vídeos ou dados gravados (se disponíveis).
- Reconhece e aborda adequadamente participantes insatisfeitos.

**Elemento 5****Classificação Elemento 5****Identifica e explora falhas de desempenho.**

- Comenta o desempenho.
- Explora a origem das falhas de desempenho.

**Elemento 6****Classificação Elemento 6****Ajuda os participantes a perceber como podem melhorar ou manter o seu desempenho.**

- Ajuda no esclarecimento das falhas de desempenho através de discussão e ensino.
- Demonstra domínio de conhecimento sobre o tema.
- Aborda todos os pontos importantes.

Direitos Autorais. *Center for Medical Simulation*, [www.harvardmedsim.org](http://www.harvardmedsim.org), 2011.
