# Supplementary material for: Translation of the Debriefing Assessment for Simulation in Healthcare in Portuguese and cross-cultural adaptation for Portugal and Brazil
Source: PubMed Central journal article supplement (PMC8265112; doi:10.1186/s41077-021-00175-z), 2021-07-07
Supplement: 41077_2021_175_MOESM5_ESM.pdf [file 41077_2021_175_MOESM5_ESM.pdf]

## DASH Rater Version

### T1 – Brazilian Portuguese

### T2 – Portuguese

### Review

DASH - *Debriefing Assessment for Simulation in Healthcare* – Avaliação de *Debriefing* em Simulação Médica – Classificação ©

DASH - *Debriefing Assessment for Simulation in Healthcare* – Avaliação de *Debriefing* em Simulação Clínica – Classificação ©

DASH - *Debriefing Assessment for Simulation in Healthcare* – Avaliação de *Debriefing* em Simulação Clínica – Classificação ©

**Instruções:** Classifique a qualidade do *debriefing* utilizando escalas de efetividade com seis Elementos. O Elemento 1 classifica a introdução ao curso de simulação e não será classificada se não observou a introdução. Os Elementos abrangem Dimensões e Comportamentos pertinentes para o *debriefing* como definido no “DASH Rater’s Handbook”. Em cada Elemento, o *debriefing* pode variar de Excelente a Prejudicial. Repare que a classificação geral dos Elementos **não** é a média das classificações para cada Dimensão ou Comportamento. Pense de forma global e não matemática quando considera o impacto das Dimensões, que podem não ter o mesmo peso. O avaliador deve ponderar as Dimensões da forma mais adequada, baseado na **visão global do Elemento**. Se não for possível avaliar uma Dimensão (ex: como se lidou com um participante aborrecido, se ninguém ficou aborrecido), ignore e não permita que isso influencie a sua avaliação.

**Instruções:** Classifique a qualidade do *debriefing* utilizando escalas de eficácia com seis Elementos. O Elemento 1 classifica a introdução ao exercício de simulação e não será classificada se não observou a introdução. Os Elementos abrangem Dimensões e Comportamentos pertinentes para o *debriefing* como definido no “Manual do Avaliador do DASH”. Em cada Elemento, o *debriefing* pode variar de Excelente a Prejudicial. Repare que a classificação geral dos Elementos **não** é a média das classificações para cada Dimensão ou Comportamento. Pense de forma global e não matemática quando considera o impacto das Dimensões, que podem não ter o mesmo peso. O avaliador deve ponderar as Dimensões da forma mais adequada, baseado na **visão global do Elemento**. Se não for possível avaliar uma Dimensão (ex: como se lidou com um participante descontente, se ninguém ficou descontente), ignore e não permita que isso influencie a sua avaliação.

**Instruções:** Classifique a qualidade do *debriefing* utilizando escalas de eficácia com seis Elementos. O Elemento 1 classifica a introdução ao exercício de simulação e não será classificado se não observou a introdução. Os Elementos abrangem Dimensões e Comportamentos pertinentes para o *debriefing* como definido no “Manual do Avaliador do DASH”. Em cada Elemento, o *debriefing* pode variar de Excelente a Prejudicial. Repare que a classificação geral dos Elementos **não** é a média das classificações para cada Dimensão ou Comportamento. Pense de forma global e não matemática quando considera o impacto das Dimensões, que podem não ter o mesmo peso. O avaliador deve ponderar as Dimensões da forma mais adequada, baseado na **visão global do Elemento**. Se não for possível avaliar uma Dimensão (ex: como se lidou com um participante descontente, se ninguém ficou descontente), ignore e não permita que isso influencie a sua avaliação.

**Escala de classificação**

| Classificação | 1                                  | 2                                         | 3                           | 4                        | 5                    | 6                                  | 7                              |
|---------------|------------------------------------|-------------------------------------------|-----------------------------|--------------------------|----------------------|------------------------------------|--------------------------------|
| Descrição     | Extremamente inefetivo/Prejudicial | Consistentemente inefetivo/Muito medíocre | Bastante inefetivo/Medíocre | Um pouco inefetivo/Médio | Bastante efetivo/Bom | Consistentemente efetivo/Muito bom | Extremamente efetivo/Excelente |

**Escala de Pontuação**

| Escore    | 1                                        | 2                                                      | 3                   | 4             | 5                    | 6                                  | 7                                     |
|-----------|------------------------------------------|--------------------------------------------------------|---------------------|---------------|----------------------|------------------------------------|---------------------------------------|
| Descrição | <b>Extremamente Ineficaz/Prejudicial</b> | Consistentemente Ineficaz/ Mau Na maior parte do tempo | Ineficaz/ Médio cre | Eficaz/ Médio | Bastante eficaz/ Bom | Consistentemente eficaz/ Muito Bom | <b>Extremamente eficaz/ Excelente</b> |

**Escala de Pontuação**

| Classificação | 1                                           | 2                                                          | 3                        | 4                          | 5                    | 6                                  | 7                                       |
|---------------|---------------------------------------------|------------------------------------------------------------|--------------------------|----------------------------|----------------------|------------------------------------|-----------------------------------------|
| Descrição     | <b>Muito Ineficaz/ Muito insatisfatório</b> | Consistentemente ineficaz/ Consistentemente insatisfatório | Ineficaz/ Insatisfatório | Pouco eficaz/ Satisfatório | Bastante eficaz/ Bom | Consistentemente eficaz/ Muito Bom | <b>Extremamente eficaz/ Excepcional</b> |

**O Elemento 1 avalia a introdução no início de um exercício de simulação.**

*(Este Elemento deve ser ignorado se o avaliador não observou a introdução do curso.)*

**Elemento 1**

**Classificação Elemento 1 \_\_\_\_\_**

**Estabelece um ambiente envolvente de aprendizagem.**

- Esclarece os objetivos do curso, ambiente, confidencialidade, papéis e expectativas.
- Estabelece um “compromisso de ficção” com os participantes.
- Tem em atenção detalhes logísticos.
- Estabelece um compromisso em respeitar os participantes e em entender as suas perspetivas.

**Os Elementos 2 a 6 avaliam o *debriefing*.**

**Elemento 2**

**Classificação Elemento 2 \_\_\_\_\_**

**Mantem um ambiente envolvente para a aprendizagem.**

- Esclarece os objetivos, papéis e expectativas do *debriefing*.
- Ajuda os participantes a envolverem-se num contexto limitado de realismo.
- Mostra respeito pelos participantes e preocupa-se com a sua segurança psicológica.

**Elemento 3**

**Classificação Elemento 3 \_\_\_\_\_**

**Estrutura o *debriefing* de forma organizada.**

- Encoraja os participantes a partilhar as suas reações e, se necessário, orienta-os para o que aconteceu no início da simulação.
- Orienta a análise do desempenho dos participantes durante o *debriefing*.
- Colabora com os participantes no resumo da aprendizagem da sessão que termina.

**Elemento 4**

**Classificação Elemento 4 \_\_\_\_\_**

**Incentiva discussões profundas.**

**O Elemento 1 avalia a introdução no início de um exercício de simulação.**

*(Este Elemento deve ser ignorado se o avaliador não observou a introdução do curso.)*

**Elemento 1**

**Classificação Elemento 1 \_\_\_\_\_**

**Estabelece um ambiente envolvente de aprendizagem.**

- Clarifica todas as questões relacionadas com os objetivos do exercício, ambiente, confidencialidade, papéis e expectativas.
- Estabelece um “contrato de ficção” com os participantes.
- Esclarece os detalhes logísticos.
- Define o compromisso de respeitar os participantes e compreender as suas perspetivas.

**Os Elementos 2 a 6 avaliam o *debriefing*.**

**Elemento 2**

**Classificação Elemento 2 \_\_\_\_\_**

**Mantem um ambiente envolvente para a aprendizagem.**

- Esclarece os objetivos, papéis e expectativas do *debriefing*.
- Ajuda os participantes a envolverem-se num contexto limitado de realismo.
- Mostra respeito pelos participantes e preocupa-se com a sua segurança psicológica.

**Elemento 3**

**Classificação Elemento 3 \_\_\_\_\_**

**Estrutura o *debriefing* de forma organizada.**

- Encoraja os participantes a partilhar as suas reações e, se necessário, orienta-os na sucessão de eventos do exercício.
- Orienta a análise do desempenho dos participantes durante o *debriefing*.
- Colabora com os participantes no resumo da aprendizagem da sessão que termina.

**Elemento 4**

**Classificação Elemento 4 \_\_\_\_\_**

**Incentiva discussões profundas.**

**O Elemento 1 avalia a introdução no início de um exercício de simulação.**

*(Este Elemento deve ser ignorado se o avaliador não observou a introdução do curso.)*

**Elemento 1**

**Classificação Elemento 1 \_\_\_\_\_**

**Estabelece um ambiente envolvente de aprendizagem.**

- Clarifica todas as questões relacionadas com os objetivos do exercício, ambiente, confidencialidade, papéis e expectativas.
- Estabelece um “contrato de ficção” com os participantes.
- Esclarece detalhes logísticos.
- Define o compromisso de respeitar os participantes e compreender as suas perspetivas.

**Os Elementos 2 a 6 avaliam o *debriefing*.**

**Elemento 2**

**Classificação Elemento 2 \_\_\_\_\_**

**Mantem um ambiente envolvente para a aprendizagem.**

- Clarifica os objetivos, papéis e expectativas do *debriefing*.
- Ajuda os participantes a envolverem-se num contexto de realismo limitado.
- Mostra respeito pelos participantes e preocupa-se com a sua segurança psicológica.

**Elemento 3**

**Classificação Elemento 3 \_\_\_\_\_**

**Estrutura o *debriefing* de forma organizada.**

- Encoraja os participantes a partilhar as suas reações e, se necessário, orienta a sucessão de eventos do exercício.
- Orienta a análise do desempenho dos participantes durante o *debriefing*.
- Colabora com os participantes no resumo da aprendizagem da sessão que termina.

**Elemento 4**

**Classificação Elemento 4 \_\_\_\_\_**

**Incentiva discussões profundas.**

|                                                                                                                                                                                                                                                                                                                                                                                                                                                                                                                                                                                                                                                                                                                                                                                                                                                                                                                                                                                                                                                                                                                                                                                                       |                                                                                                                                                                                                                                                                                                                                                                                                                                                                                                                                                                                                                                                                                                                                                                                                                                                                                                                                                                                                                                                                                                                                                                                                                              |                                                                                                                                                                                                                                                                                                                                                                                                                                                                                                                                                                                                                                                                                                                                                                                                                                                                                                                                                                                                                                                                                                                                                                                                                      |
|-------------------------------------------------------------------------------------------------------------------------------------------------------------------------------------------------------------------------------------------------------------------------------------------------------------------------------------------------------------------------------------------------------------------------------------------------------------------------------------------------------------------------------------------------------------------------------------------------------------------------------------------------------------------------------------------------------------------------------------------------------------------------------------------------------------------------------------------------------------------------------------------------------------------------------------------------------------------------------------------------------------------------------------------------------------------------------------------------------------------------------------------------------------------------------------------------------|------------------------------------------------------------------------------------------------------------------------------------------------------------------------------------------------------------------------------------------------------------------------------------------------------------------------------------------------------------------------------------------------------------------------------------------------------------------------------------------------------------------------------------------------------------------------------------------------------------------------------------------------------------------------------------------------------------------------------------------------------------------------------------------------------------------------------------------------------------------------------------------------------------------------------------------------------------------------------------------------------------------------------------------------------------------------------------------------------------------------------------------------------------------------------------------------------------------------------|----------------------------------------------------------------------------------------------------------------------------------------------------------------------------------------------------------------------------------------------------------------------------------------------------------------------------------------------------------------------------------------------------------------------------------------------------------------------------------------------------------------------------------------------------------------------------------------------------------------------------------------------------------------------------------------------------------------------------------------------------------------------------------------------------------------------------------------------------------------------------------------------------------------------------------------------------------------------------------------------------------------------------------------------------------------------------------------------------------------------------------------------------------------------------------------------------------------------|
| <ul style="list-style-type: none"> <li>• Usa exemplos concretos e resultados como base para seus comentários e discussão.</li> <li>• Revela seu raciocínio e opinião.</li> <li>• Facilita a discussão com técnicas de linguagem verbal e não-verbal.</li> <li>• Usa vídeos ou dados gravados (se disponíveis).</li> <li>• Reconhece e gere participantes aborrecidos.</li> </ul> <p><b>Elemento 5</b><br/> <b>Classificação Elemento 5</b> _____<br/> <b>Identifica e explora falhas de desempenho.</b></p> <ul style="list-style-type: none"> <li>• Comenta o desempenho.</li> <li>• Explora a origem das falhas de desempenho.</li> </ul> <p><b>Elemento 6</b><br/> <b>Classificação Elemento 6</b> _____<br/> <b>Ajuda os participantes a perceber como podem melhorar ou manter seu bom desempenho.</b></p> <ul style="list-style-type: none"> <li>• Ajuda no esclarecimento das falhas de desempenho através de discussão e ensino.</li> <li>• Demonstra domínio de conhecimento sobre o tema.</li> <li>• Aborda todos os pontos importantes.</li> </ul> <p>Direitos Autorais. <i>Center for Medical Simulation</i>, <a href="http://www.harvardmedsim.org">www.harvardmedsim.org</a>, 2011.</p> | <ul style="list-style-type: none"> <li>• Usa exemplos e resultados concretos como base para os seus comentários e discussão.</li> <li>• Revela o seu raciocínio e opinião.</li> <li>• Facilita a discussão com técnicas de linguagem verbal e não-verbal.</li> <li>• Usa vídeos ou dados gravados (se disponíveis).</li> <li>• Reconhece e aborda adequadamente participantes insatisfeitos.</li> </ul> <p><b>Elemento 5</b> <b>Classificação Elemento 5</b> _____</p> <p><b>Identifica e explora falhas de desempenho.</b></p> <ul style="list-style-type: none"> <li>• Comenta o desempenho.</li> <li>• Explora a origem das limitações do desempenho.</li> </ul> <p><b>Elemento 6</b> <b>Classificação Elemento 6</b> _____</p> <p><b>Ajuda os participantes a perceber como podem melhorar ou manter o seu desempenho.</b></p> <ul style="list-style-type: none"> <li>• Ajuda no esclarecimento das limitações do desempenho através de discussão e ensino.</li> <li>• Demonstra domínio de conhecimento sobre o tema.</li> <li>• Aborda todos os pontos importantes.</li> </ul> <p>Direitos Autorais. <i>Center for Medical Simulation</i>, <a href="http://www.harvardmedsim.org">www.harvardmedsim.org</a>, 2011.</p> | <ul style="list-style-type: none"> <li>• Usa exemplos e resultados concretos como base para os seus comentários e discussão.</li> <li>• Revela o seu raciocínio e opinião.</li> <li>• Facilita a discussão com técnicas de linguagem verbal e não verbal.</li> <li>• Usa vídeos ou dados gravados (se disponíveis).</li> <li>• Reconhece e aborda adequadamente participantes insatisfeitos.</li> </ul> <p><b>Elemento 5</b> <b>Classificação Elemento 5</b> _____</p> <p><b>Identifica e explora falhas de desempenho.</b></p> <ul style="list-style-type: none"> <li>• Comenta o desempenho.</li> <li>• Explora a origem das falhas de desempenho.</li> </ul> <p><b>Elemento 6</b> <b>Classificação Elemento 6</b> _____</p> <p><b>Ajuda os participantes a perceber como podem melhorar ou manter o seu desempenho.</b></p> <ul style="list-style-type: none"> <li>• Ajuda no esclarecimento das falhas de desempenho através de discussão e ensino.</li> <li>• Demonstra domínio de conhecimento sobre o tema.</li> <li>• Aborda todos os pontos importantes.</li> </ul> <p>Direitos Autorais. <i>Center for Medical Simulation</i>, <a href="http://www.harvardmedsim.org">www.harvardmedsim.org</a>, 2011.</p> |
|-------------------------------------------------------------------------------------------------------------------------------------------------------------------------------------------------------------------------------------------------------------------------------------------------------------------------------------------------------------------------------------------------------------------------------------------------------------------------------------------------------------------------------------------------------------------------------------------------------------------------------------------------------------------------------------------------------------------------------------------------------------------------------------------------------------------------------------------------------------------------------------------------------------------------------------------------------------------------------------------------------------------------------------------------------------------------------------------------------------------------------------------------------------------------------------------------------|------------------------------------------------------------------------------------------------------------------------------------------------------------------------------------------------------------------------------------------------------------------------------------------------------------------------------------------------------------------------------------------------------------------------------------------------------------------------------------------------------------------------------------------------------------------------------------------------------------------------------------------------------------------------------------------------------------------------------------------------------------------------------------------------------------------------------------------------------------------------------------------------------------------------------------------------------------------------------------------------------------------------------------------------------------------------------------------------------------------------------------------------------------------------------------------------------------------------------|----------------------------------------------------------------------------------------------------------------------------------------------------------------------------------------------------------------------------------------------------------------------------------------------------------------------------------------------------------------------------------------------------------------------------------------------------------------------------------------------------------------------------------------------------------------------------------------------------------------------------------------------------------------------------------------------------------------------------------------------------------------------------------------------------------------------------------------------------------------------------------------------------------------------------------------------------------------------------------------------------------------------------------------------------------------------------------------------------------------------------------------------------------------------------------------------------------------------|

## DASH Student Version

### T1 – Brazilian Portuguese

DASH - *Debriefing Assessment for Simulation in Healthcare* – Avaliação de *Debriefing* em Simulação Médica – Versão do Formando ©

**Instruções:** Pede-se que resuma a sua impressão sobre a introdução e *debriefing* deste exercício de simulação. Utilize a seguinte escala para classificar cada um dos seis “Elementos”. Cada Elemento é composto por diferentes Comportamentos do instrutor, descritos abaixo. Se um dos Comportamentos listados for impossível de avaliar (ex: como o instrutor lidou com pessoas aborrecidas, se ninguém esteve aborrecido), deixe o espaço em branco e não permita que isto influencie a sua avaliação. O instrutor pode ter sido bem-sucedido ou menos bem-sucedido dentro de cada Elemento. A classificação de Elemento representa a sua impressão **geral** do desempenho do instrutor no Elemento em questão. Faça o possível para classificar a **efetividade geral de todo o Elemento**, guiado pela observação dos comportamentos únicos que o definem.

**Escala de classificação**

| Classificação | 1                                  | 2                                         | 3                           | 4                           | 5                    | 6                                  | 7                              |
|---------------|------------------------------------|-------------------------------------------|-----------------------------|-----------------------------|----------------------|------------------------------------|--------------------------------|
| Descrição     | Extremamente inefetivo/Prejudicial | Consistentemente inefetivo/Muito medíocre | Bastante inefetivo/Medíocre | Um pouco inefetivo/Medíocre | Bastante efetivo/Bom | Consistentemente efetivo/Muito bom | Extremamente efetivo/Excelente |

O Elemento 1 avalia a introdução no início de um exercício de simulação.

*Ignore este elemento se não tiver participado na introdução. Se não existiu introdução e sentiu que deveria ter existido para orientá-lo, a sua avaliação deverá refletir isso.*

**Elemento 1**

**Classificação Elemento 1 \_\_\_\_\_**

**O instrutor preparou o cenário para uma experiência envolvente de aprendizagem.**

- O instrutor apresentou-se, descreveu o ambiente do cenário, o que é esperado durante a atividade e os objetivos da aprendizagem.
- O instrutor expôs os pontos fortes e fracos da simulação e o que se pode fazer para aproveitar ao máximo a experiência em simulação médica.

### T2 – Portuguese

DASH - *Debriefing Assessment for Simulation in Healthcare* – Avaliação de *Debriefing* em Simulação Clínica – Versão do Participante ©

**Instruções:** Pede-se que resuma a sua avaliação sobre a introdução e *debriefing* deste exercício de simulação. Utilize a seguinte escala para classificar cada um dos seis “Elementos”. Cada Elemento é composto por diferentes Comportamentos do instrutor, descritos abaixo. Se um dos Comportamentos listados for impossível de avaliar (ex: como o instrutor lidou com pessoas descontentes, se ninguém esteve descontente), deixe o espaço em branco e não permita que isto influencie a sua avaliação. O instrutor pode ter sido mais ou menos bem-sucedido dentro de cada Elemento. A classificação de Elemento representa a sua impressão **geral** do desempenho do instrutor no Elemento em questão. Faça o possível para classificar a **efetividade geral de todo o Elemento**, guiado pela observação dos comportamentos únicos que o definem.

**Escala de Pontuação**

| Escore    | 1                                        | 2                                                           | 3                 | 4               | 5                | 6                                 | 7                                    |
|-----------|------------------------------------------|-------------------------------------------------------------|-------------------|-----------------|------------------|-----------------------------------|--------------------------------------|
| Descrição | <b>Extremamente Ineficaz/Prejudicial</b> | Consistentemente Ineficaz/Muito Mau Na maior parte do tempo | Ineficaz/Medíocre | Eficaz/Medíocre | Muito eficaz/Bom | Consistentemente Eficaz/Muito Bom | <b>Extremamente Eficaz/Excelente</b> |

O Elemento 1 avalia a introdução no início do exercício de simulação.

*Ignore este elemento se não tiver participado na introdução. Se não existiu introdução e sentiu que deveria ter existido para orientá-lo, a sua avaliação deverá refletir isso.*

**Elemento 1**

**Classificação Elemento 1 \_\_\_\_\_**

**O instrutor preparou o cenário para uma experiência envolvente de aprendizagem.**

- O instrutor apresentou-se, descreveu a envolvência do cenário, o esperado durante a atividade e os objetivos da aprendizagem.
- O instrutor expôs os pontos fortes e as limitações da simulação e o que se pode fazer para aproveitar ao máximo a experiência em simulação clínica.

### Review

DASH - *Debriefing Assessment for Simulation in Healthcare* – Avaliação de *Debriefing* em Simulação Clínica – Versão do Participante ©

**Instruções:** Pede-se que resuma a sua avaliação sobre a introdução e *debriefing* deste exercício de simulação. Utilize a seguinte escala para classificar cada um dos seis “Elementos”. Cada Elemento é composto por diferentes Comportamentos do facilitador, descritos abaixo. Se um dos Comportamentos listados for impossível de avaliar (ex: como o facilitador lidou com pessoas descontentes, se ninguém esteve descontente), deixe o espaço em branco e não permita que isto influencie a sua avaliação. O facilitador pode ter sido mais ou menos bem-sucedido dentro de cada Elemento. A classificação do Elemento representa a sua impressão **geral** do desempenho do facilitador no Elemento em questão. Faça o possível para classificar a **eficácia geral de todo o Elemento**, guiado pela observação dos comportamentos únicos que o definem.

**Escala de Pontuação**

| Classificação | 1                                           | 2                                                         | 3                       | 4                         | 5                   | 6                                 | 7                                      |
|---------------|---------------------------------------------|-----------------------------------------------------------|-------------------------|---------------------------|---------------------|-----------------------------------|----------------------------------------|
| Descrição     | <b>Muito Ineficaz/ Muito insatisfatório</b> | Consistentemente ineficaz/Consistentemente insatisfatório | Ineficaz/Insatisfatório | Pouco eficaz/Satisfatório | Bastante eficaz/Bom | Consistentemente eficaz/Muito Bom | <b>Extremamente eficaz/Excepcional</b> |

O Elemento 1 avalia a introdução no início do exercício de simulação.

*Ignore este elemento se não tiver participado na introdução. Se não existiu introdução e sentiu que deveria ter existido para orientá-lo, a sua avaliação deverá refletir isso.*

**Elemento 1**

**Classificação Elemento 1 \_\_\_\_\_**

**O facilitador preparou o cenário para uma experiência envolvente de aprendizagem.**

- O facilitador apresentou-se, descreveu o local do cenário, o esperado durante a atividade e os objetivos de aprendizagem.
- O facilitador expôs os pontos fortes e as limitações da simulação e o que se pode fazer para aproveitar ao máximo a experiência em simulação.

|                                                                                                                                                                                                                                                                                                                                                                                                                                                                                                                                                                                                                                                                                                                                                                                                                                                                                                                                                                                                                                                                                                                                                                                                                                                                                                                                                                                                                                                                                                                                                                                                                                                                                                                                                                                                                                                                                                                                                                                                                                                                                                                                                                                                                                                                                                                                                                                                                                                                                                                                                |                                                                                                                                                                                                                                                                                                                                                                                                                                                                                                                                                                                                                                                                                                                                                                                                                                                                                                                                                                                                                                                                                                                                                                                                                                                                                                                                                                                                                                                                                                                                                                                                                                                                                                                                                                                                                                                                                                                                                                                                                                                                                                                                                                                                                                                                                                                                                                                                                                                                                                                                                                                                                                                              |                                                                                                                                                                                                                                                                                                                                                                                                                                                                                                                                                                                                                                                                                                                                                                                                                                                                                                                                                                                                                                                                                                                                                                                                                                                                                                                                                                                                                                                                                                                                                                                                                                                                                                                                                                                                                                                                                                                                                                                                                                                                                                                                                                                                                                                                                                                                                                                                                                                                                                                                                          |
|------------------------------------------------------------------------------------------------------------------------------------------------------------------------------------------------------------------------------------------------------------------------------------------------------------------------------------------------------------------------------------------------------------------------------------------------------------------------------------------------------------------------------------------------------------------------------------------------------------------------------------------------------------------------------------------------------------------------------------------------------------------------------------------------------------------------------------------------------------------------------------------------------------------------------------------------------------------------------------------------------------------------------------------------------------------------------------------------------------------------------------------------------------------------------------------------------------------------------------------------------------------------------------------------------------------------------------------------------------------------------------------------------------------------------------------------------------------------------------------------------------------------------------------------------------------------------------------------------------------------------------------------------------------------------------------------------------------------------------------------------------------------------------------------------------------------------------------------------------------------------------------------------------------------------------------------------------------------------------------------------------------------------------------------------------------------------------------------------------------------------------------------------------------------------------------------------------------------------------------------------------------------------------------------------------------------------------------------------------------------------------------------------------------------------------------------------------------------------------------------------------------------------------------------|--------------------------------------------------------------------------------------------------------------------------------------------------------------------------------------------------------------------------------------------------------------------------------------------------------------------------------------------------------------------------------------------------------------------------------------------------------------------------------------------------------------------------------------------------------------------------------------------------------------------------------------------------------------------------------------------------------------------------------------------------------------------------------------------------------------------------------------------------------------------------------------------------------------------------------------------------------------------------------------------------------------------------------------------------------------------------------------------------------------------------------------------------------------------------------------------------------------------------------------------------------------------------------------------------------------------------------------------------------------------------------------------------------------------------------------------------------------------------------------------------------------------------------------------------------------------------------------------------------------------------------------------------------------------------------------------------------------------------------------------------------------------------------------------------------------------------------------------------------------------------------------------------------------------------------------------------------------------------------------------------------------------------------------------------------------------------------------------------------------------------------------------------------------------------------------------------------------------------------------------------------------------------------------------------------------------------------------------------------------------------------------------------------------------------------------------------------------------------------------------------------------------------------------------------------------------------------------------------------------------------------------------------------------|----------------------------------------------------------------------------------------------------------------------------------------------------------------------------------------------------------------------------------------------------------------------------------------------------------------------------------------------------------------------------------------------------------------------------------------------------------------------------------------------------------------------------------------------------------------------------------------------------------------------------------------------------------------------------------------------------------------------------------------------------------------------------------------------------------------------------------------------------------------------------------------------------------------------------------------------------------------------------------------------------------------------------------------------------------------------------------------------------------------------------------------------------------------------------------------------------------------------------------------------------------------------------------------------------------------------------------------------------------------------------------------------------------------------------------------------------------------------------------------------------------------------------------------------------------------------------------------------------------------------------------------------------------------------------------------------------------------------------------------------------------------------------------------------------------------------------------------------------------------------------------------------------------------------------------------------------------------------------------------------------------------------------------------------------------------------------------------------------------------------------------------------------------------------------------------------------------------------------------------------------------------------------------------------------------------------------------------------------------------------------------------------------------------------------------------------------------------------------------------------------------------------------------------------------------|
| <ul style="list-style-type: none"> <li>• O instrutor teve em atenção detalhes logísticos necessários, como localização da casa-de-banho, disponibilidade de alimentação e programa.</li> <li>• O instrutor estimulou-o a partilhar os seus pensamentos e questões sobre a simulação que iria acontecer e o <i>debriefing</i> e reforçou que não iria ser envergonhado ou humilhado durante o processo.</li> </ul> <p>Os Elementos 2 a 6 avaliam o <i>debriefing</i>.</p> <p><b>Elemento 2</b><br/> <b>Classificação Elemento 2 _____</b><br/> <b>O instrutor manteve um ambiente envolvente para a aprendizagem.</b></p> <ul style="list-style-type: none"> <li>• O instrutor esclareceu o objetivo do <i>debriefing</i>, o que era esperado de si e qual o papel do instrutor no <i>debriefing</i>.</li> <li>• O instrutor reconheceu os problemas relacionados com o realismo e ajudou-o a aprender apesar de se tratar de casos simulados.</li> <li>• Sentiu que o instrutor respeitou os participantes.</li> <li>• O objetivo principal centrou-se na aprendizagem e não em fazer os participantes sentirem-se mal por cometer erros.</li> <li>• Os participantes puderam partilhar pensamentos e emoções sem medo de se sentirem envergonhados ou humilhados.</li> </ul> <p><b>Elemento 3</b><br/> <b>Classificação Elemento 3 _____</b><br/> <b>O instrutor estruturou o <i>debriefing</i> de forma organizada.</b></p> <ul style="list-style-type: none"> <li>• A conversa progrediu de forma lógica em vez de saltar de ponto em ponto.</li> <li>• No início do <i>debriefing</i>, foi encorajado a partilhar as suas reações genuínas relativamente ao caso e o instrutor considerou-as de forma séria.</li> <li>• Durante o <i>debriefing</i>, o instrutor ajudou-o a analisar as ações e pensamentos enquanto se revia o caso.</li> <li>• No final, foi feito um resumo do caso onde o instrutor ajudou a juntar todas as observações e relacionou o caso com diferentes formas para que possa melhorar a sua prática clínica futura.</li> </ul> <p><b>Elemento 4</b><br/> <b>Classificação Elemento 4 _____</b><br/> <b>O instrutor provocou discussões profundas que o levaram a refletir sobre o seu desempenho.</b></p> <ul style="list-style-type: none"> <li>• O instrutor usou exemplos concretos – não apenas comentários abstratos e generalizados – para o fazer pensar sobre o seu desempenho.</li> <li>• O ponto de vista do instrutor foi claro; não teve que adivinhar o que o instrutor estaria a pensar.</li> </ul> | <ul style="list-style-type: none"> <li>• O instrutor informou detalhes logísticos necessários, como localização dos recursos sanitários, disponibilidade de alimentação e programa.</li> <li>• O instrutor estimulou-o a partilhar os seus pensamentos e questões sobre o caso simulado e o <i>debriefing</i> e reforçou que não iriam ser constrangidos ou inferiorizados durante o processo.</li> </ul> <p>Os Elementos 2 a 6 avaliam o <i>debriefing</i>.</p> <p><b>Elemento 2</b><br/> <b>Classificação Elemento 2 _____</b><br/> <b>O instrutor manteve um ambiente envolvente para a aprendizagem.</b></p> <ul style="list-style-type: none"> <li>• O instrutor esclareceu os objetivos do <i>debriefing</i>, o que era esperado dos participantes e qual o seu papel no <i>debriefing</i>.</li> <li>• O instrutor reconheceu os problemas relacionados com o realismo e ajudou-o a aprender apesar de se tratar de casos simulados.</li> <li>• Sentiu que o instrutor respeitou os participantes.</li> <li>• O objetivo principal centrou-se na aprendizagem e não em fazer os participantes sentirem-se mal por cometer erros.</li> <li>• Os participantes puderam partilhar pensamentos e emoções sem medo de se sentirem constrangidos ou inferiorizados.</li> </ul> <p><b>Elemento 3</b><br/> <b>Classificação Elemento 3 _____</b><br/> <b>O instrutor estruturou o <i>debriefing</i> de forma organizada.</b></p> <ul style="list-style-type: none"> <li>• A conversa progrediu de forma lógica em vez de saltar de ponto em ponto.</li> <li>• No início do <i>debriefing</i>, foi encorajado a partilhar as suas reações genuínas relativamente ao caso e o instrutor considerou-as de forma séria.</li> <li>• Durante o <i>debriefing</i>, o instrutor ajudou-o a analisar as ações e pensamentos enquanto se revia o caso.</li> <li>• No final, foi feito um resumo do caso onde o instrutor ajudou a integrar todas as observações e relacionou o caso com diferentes envolvências para que possa melhorar a sua prática clínica futura.</li> </ul> <p><b>Elemento 4</b><br/> <b>Classificação Elemento 4 _____</b><br/> <b>O instrutor provocou discussões profundas que o levaram a refletir sobre seu desempenho.</b></p> <ul style="list-style-type: none"> <li>• O instrutor usou exemplos concretos – não apenas comentários abstratos e generalizados – para o fazer refletir sobre o seu desempenho.</li> <li>• O ponto de vista do instrutor foi claro; não teve que adivinhar o seu pensamento.</li> <li>• O instrutor ouviu e fez com que os participantes se sentissem ouvidos ao tentar incluir todos na discussão,</li> </ul> | <ul style="list-style-type: none"> <li>• O facilitador informou os detalhes logísticos necessários, como localização dos recursos sanitários, disponibilidade de alimentação e programa.</li> <li>• O facilitador estimulou-o a partilhar os seus pensamentos e questões sobre o caso simulado e o <i>debriefing</i> e reforçou que não iriam existir constrangimentos durante o processo.</li> </ul> <p>Os Elementos 2 a 6 avaliam o <i>debriefing</i>.</p> <p><b>Elemento 2</b><br/> <b>Classificação Elemento 2 _____</b><br/> <b>O facilitador manteve um ambiente envolvente para a aprendizagem.</b></p> <ul style="list-style-type: none"> <li>• O facilitador esclareceu os objetivos do <i>debriefing</i>, o que era esperado dos participantes e qual o seu papel no <i>debriefing</i>.</li> <li>• O facilitador reconheceu os problemas relacionados com o realismo e ajudou-o a aprender apesar de se tratar de casos simulados.</li> <li>• Sentiu que o facilitador respeitou os participantes.</li> <li>• Os participantes puderam partilhar pensamentos e emoções sem medo de se sentirem constrangidos ou inferiorizados.</li> </ul> <p><b>Elemento 3</b><br/> <b>Classificação Elemento 3 _____</b><br/> <b>O facilitador estruturou o <i>debriefing</i> de forma organizada.</b></p> <ul style="list-style-type: none"> <li>• A conversa progrediu de forma lógica em vez de saltar de ponto em ponto.</li> <li>• No início do <i>debriefing</i>, foi encorajado a partilhar as suas reações genuínas relativamente ao caso e o facilitador considerou-as de forma séria.</li> <li>• Durante o <i>debriefing</i>, o facilitador ajudou-o a analisar as ações e pensamentos enquanto se revia o caso.</li> <li>• No final, foi feito um resumo do caso onde o facilitador o ajudou a integrar todas as observações e <b>relacionou o caso de diferentes maneiras</b> para que possa melhorar a sua prática clínica futura.</li> </ul> <p><b>Elemento 4</b><br/> <b>Classificação Elemento 4 _____</b><br/> <b>O facilitador provocou discussões profundas que o levaram a refletir sobre o seu desempenho.</b></p> <ul style="list-style-type: none"> <li>• O facilitador usou exemplos concretos – não apenas comentários abstratos e generalizados – para fazê-lo refletir sobre o seu desempenho.</li> <li>• O ponto de vista do facilitador foi claro; não teve que adivinhar o seu pensamento.</li> <li>• O facilitador ouviu e fez com que os participantes se sentissem ouvidos ao tentar incluir todos na discussão,</li> </ul> |
|------------------------------------------------------------------------------------------------------------------------------------------------------------------------------------------------------------------------------------------------------------------------------------------------------------------------------------------------------------------------------------------------------------------------------------------------------------------------------------------------------------------------------------------------------------------------------------------------------------------------------------------------------------------------------------------------------------------------------------------------------------------------------------------------------------------------------------------------------------------------------------------------------------------------------------------------------------------------------------------------------------------------------------------------------------------------------------------------------------------------------------------------------------------------------------------------------------------------------------------------------------------------------------------------------------------------------------------------------------------------------------------------------------------------------------------------------------------------------------------------------------------------------------------------------------------------------------------------------------------------------------------------------------------------------------------------------------------------------------------------------------------------------------------------------------------------------------------------------------------------------------------------------------------------------------------------------------------------------------------------------------------------------------------------------------------------------------------------------------------------------------------------------------------------------------------------------------------------------------------------------------------------------------------------------------------------------------------------------------------------------------------------------------------------------------------------------------------------------------------------------------------------------------------------|--------------------------------------------------------------------------------------------------------------------------------------------------------------------------------------------------------------------------------------------------------------------------------------------------------------------------------------------------------------------------------------------------------------------------------------------------------------------------------------------------------------------------------------------------------------------------------------------------------------------------------------------------------------------------------------------------------------------------------------------------------------------------------------------------------------------------------------------------------------------------------------------------------------------------------------------------------------------------------------------------------------------------------------------------------------------------------------------------------------------------------------------------------------------------------------------------------------------------------------------------------------------------------------------------------------------------------------------------------------------------------------------------------------------------------------------------------------------------------------------------------------------------------------------------------------------------------------------------------------------------------------------------------------------------------------------------------------------------------------------------------------------------------------------------------------------------------------------------------------------------------------------------------------------------------------------------------------------------------------------------------------------------------------------------------------------------------------------------------------------------------------------------------------------------------------------------------------------------------------------------------------------------------------------------------------------------------------------------------------------------------------------------------------------------------------------------------------------------------------------------------------------------------------------------------------------------------------------------------------------------------------------------------------|----------------------------------------------------------------------------------------------------------------------------------------------------------------------------------------------------------------------------------------------------------------------------------------------------------------------------------------------------------------------------------------------------------------------------------------------------------------------------------------------------------------------------------------------------------------------------------------------------------------------------------------------------------------------------------------------------------------------------------------------------------------------------------------------------------------------------------------------------------------------------------------------------------------------------------------------------------------------------------------------------------------------------------------------------------------------------------------------------------------------------------------------------------------------------------------------------------------------------------------------------------------------------------------------------------------------------------------------------------------------------------------------------------------------------------------------------------------------------------------------------------------------------------------------------------------------------------------------------------------------------------------------------------------------------------------------------------------------------------------------------------------------------------------------------------------------------------------------------------------------------------------------------------------------------------------------------------------------------------------------------------------------------------------------------------------------------------------------------------------------------------------------------------------------------------------------------------------------------------------------------------------------------------------------------------------------------------------------------------------------------------------------------------------------------------------------------------------------------------------------------------------------------------------------------------|

|                                                                                                                                                                                                                                                                                                                                                                                                                                                                                                                                                                                                                                                                                                                                                                                                                                                                                                                                                                                                                                                                                                                                                                                                                                                                                                                                                                                                                                                                                                                                                                                                                                                           |                                                                                                                                                                                                                                                                                                                                                                                                                                                                                                                                                                                                                                                                                                                                                                                                                                                                                                                                                                                                                                                                                                                                                                                                                                                                                                                                                                                                                                                                                                                                                        |                                                                                                                                                                                                                                                                                                                                                                                                                                                                                                                                                                                                                                                                                                                                                                                                                                                                                                                                                                                                                                                                                                                                                                                                                                                                                                                                                                                                                                                                                                                                                                                |
|-----------------------------------------------------------------------------------------------------------------------------------------------------------------------------------------------------------------------------------------------------------------------------------------------------------------------------------------------------------------------------------------------------------------------------------------------------------------------------------------------------------------------------------------------------------------------------------------------------------------------------------------------------------------------------------------------------------------------------------------------------------------------------------------------------------------------------------------------------------------------------------------------------------------------------------------------------------------------------------------------------------------------------------------------------------------------------------------------------------------------------------------------------------------------------------------------------------------------------------------------------------------------------------------------------------------------------------------------------------------------------------------------------------------------------------------------------------------------------------------------------------------------------------------------------------------------------------------------------------------------------------------------------------|--------------------------------------------------------------------------------------------------------------------------------------------------------------------------------------------------------------------------------------------------------------------------------------------------------------------------------------------------------------------------------------------------------------------------------------------------------------------------------------------------------------------------------------------------------------------------------------------------------------------------------------------------------------------------------------------------------------------------------------------------------------------------------------------------------------------------------------------------------------------------------------------------------------------------------------------------------------------------------------------------------------------------------------------------------------------------------------------------------------------------------------------------------------------------------------------------------------------------------------------------------------------------------------------------------------------------------------------------------------------------------------------------------------------------------------------------------------------------------------------------------------------------------------------------------|--------------------------------------------------------------------------------------------------------------------------------------------------------------------------------------------------------------------------------------------------------------------------------------------------------------------------------------------------------------------------------------------------------------------------------------------------------------------------------------------------------------------------------------------------------------------------------------------------------------------------------------------------------------------------------------------------------------------------------------------------------------------------------------------------------------------------------------------------------------------------------------------------------------------------------------------------------------------------------------------------------------------------------------------------------------------------------------------------------------------------------------------------------------------------------------------------------------------------------------------------------------------------------------------------------------------------------------------------------------------------------------------------------------------------------------------------------------------------------------------------------------------------------------------------------------------------------|
| <ul style="list-style-type: none"> <li>• O instrutor ouviu e fez com que os participantes se sentissem ouvidos ao tentar incluir todos, interpretar os comentários e utilizar linguagem não-verbal, como contacto visual e acenar com a cabeça, etc.</li> <li>• O instrutor usou vídeos ou dados gravados para apoiar a análise e aprendizagem.</li> <li>• Se alguém ficou aborrecido no <i>debriefing</i>, o instrutor foi respeitador e construtivo ao tentar ajuda-lo a lidar com a situação.</li> </ul> <p><b>Elemento 5</b><br/> <b>Classificação Elemento 5 _____</b><br/> <b>O instrutor identificou o que fez bem e mal – e porquê.</b></p> <ul style="list-style-type: none"> <li>• Recebeu comentários concretos sobre o seu desempenho ou do grupo baseados em declarações objetivas e honestas do instrutor.</li> <li>• O instrutor ajudou a explorar o que estava a pensar ou o que tentava alcançar nos momentos-chave.</li> </ul> <p><b>Elemento 6</b><br/> <b>Classificação Elemento 6 _____</b><br/> <b>Ajudou os participantes a perceber como podem melhorar ou manter seu bom desempenho.</b></p> <ul style="list-style-type: none"> <li>• O instrutor ajudou-o a aprender como pode melhorar áreas de fraqueza ou como repetir um bom desempenho.</li> <li>• O instrutor era experiente e usou os seus conhecimentos para o ajudar a perceber como pode desenvolver um bom desempenho no futuro.</li> <li>• O instrutor garantiu que todos os pontos importantes foram abordados.</li> </ul> <p>Direitos Autorais. <i>Center for Medical Simulation</i>, <a href="http://www.harvardmedsim.org">www.harvardmedsim.org</a>, 2011.</p> | <p>interpretar os comentários e utilizar linguagem não-verbal, como olhar nos olhos dos participantes ou acenar com a cabeça.</p> <ul style="list-style-type: none"> <li>• O instrutor usou vídeos ou dados gravados para apoiar a análise e aprendizagem.</li> <li>• Se alguém ficou descontente no <i>debriefing</i>, o instrutor foi respeitador e construtivo ao tentar ajuda-lo a lidar com a situação.</li> </ul> <p><b>Elemento 5</b><br/> <b>Classificação Elemento 5 _____</b><br/> <b>O instrutor identificou o que fizermos melhor e pior – e porquê</b></p> <ul style="list-style-type: none"> <li>• Recebeu comentários concretos sobre o seu desempenho e/ou do grupo baseados em declarações objetivas e honestas do instrutor.</li> <li>• O instrutor ajudou a explorar o que pensava ou o que tentava alcançar nos momentos-chave.</li> </ul> <p><b>Elemento 6</b><br/> <b>Classificação Elemento 6 _____</b><br/> <b>Ajudou os participantes a perceber como podem melhorar ou manter um bom desempenho.</b></p> <ul style="list-style-type: none"> <li>• O instrutor ajudou-o a aprender como pode melhorar deficiências ou como repetir um bom desempenho.</li> <li>• O instrutor era experiente e usou o seu conhecimento para ajudá-lo a perceber como pode melhorar o desempenho no futuro.</li> <li>• O instrutor garantiu que todos os pontos importantes foram abordados.</li> </ul> <p>Direitos Autorais. <i>Center for Medical Simulation</i>, <a href="http://www.harvardmedsim.org">www.harvardmedsim.org</a>, 2011.</p> | <p>interpretar os comentários e utilizar linguagem não verbal, como olhar nos olhos dos participantes ou acenar com a cabeça.</p> <ul style="list-style-type: none"> <li>• O facilitador usou vídeos ou dados gravados para apoiar a análise e aprendizagem.</li> <li>• Se alguém ficou descontente no <i>debriefing</i>, o facilitador foi respeitador e construtivo ao tentar ajuda-lo a lidar com a situação.</li> </ul> <p><b>Elemento 5</b><br/> <b>Classificação Elemento 5 _____</b><br/> <b>O facilitador identificou o que fizermos melhor e pior – e por que.</b></p> <ul style="list-style-type: none"> <li>• Recebeu comentários concretos sobre o seu desempenho e/ou do grupo baseados em declarações objetivas e honestas do facilitador.</li> <li>• O facilitador ajudou a explorar o que pensava ou o que tentava alcançar nos momentos chave.</li> </ul> <p><b>Elemento 6</b><br/> <b>Classificação Elemento 6 _____</b><br/> <b>Ajudou os participantes a perceber como podem melhorar ou manter um bom desempenho.</b></p> <ul style="list-style-type: none"> <li>• O facilitador ajudou-o a aprender como pode melhorar deficiências e/ou como repetir um bom desempenho.</li> <li>• O facilitador era experiente e usou o seu conhecimento para o ajudar a perceber como pode melhorar o seu desempenho no futuro.</li> <li>• O facilitador garantiu que todos os pontos importantes foram abordados.</li> </ul> <p>Direitos Autorais. <i>Center for Medical Simulation</i>, <a href="http://www.harvardmedsim.org">www.harvardmedsim.org</a>, 2011.</p> |
|-----------------------------------------------------------------------------------------------------------------------------------------------------------------------------------------------------------------------------------------------------------------------------------------------------------------------------------------------------------------------------------------------------------------------------------------------------------------------------------------------------------------------------------------------------------------------------------------------------------------------------------------------------------------------------------------------------------------------------------------------------------------------------------------------------------------------------------------------------------------------------------------------------------------------------------------------------------------------------------------------------------------------------------------------------------------------------------------------------------------------------------------------------------------------------------------------------------------------------------------------------------------------------------------------------------------------------------------------------------------------------------------------------------------------------------------------------------------------------------------------------------------------------------------------------------------------------------------------------------------------------------------------------------|--------------------------------------------------------------------------------------------------------------------------------------------------------------------------------------------------------------------------------------------------------------------------------------------------------------------------------------------------------------------------------------------------------------------------------------------------------------------------------------------------------------------------------------------------------------------------------------------------------------------------------------------------------------------------------------------------------------------------------------------------------------------------------------------------------------------------------------------------------------------------------------------------------------------------------------------------------------------------------------------------------------------------------------------------------------------------------------------------------------------------------------------------------------------------------------------------------------------------------------------------------------------------------------------------------------------------------------------------------------------------------------------------------------------------------------------------------------------------------------------------------------------------------------------------------|--------------------------------------------------------------------------------------------------------------------------------------------------------------------------------------------------------------------------------------------------------------------------------------------------------------------------------------------------------------------------------------------------------------------------------------------------------------------------------------------------------------------------------------------------------------------------------------------------------------------------------------------------------------------------------------------------------------------------------------------------------------------------------------------------------------------------------------------------------------------------------------------------------------------------------------------------------------------------------------------------------------------------------------------------------------------------------------------------------------------------------------------------------------------------------------------------------------------------------------------------------------------------------------------------------------------------------------------------------------------------------------------------------------------------------------------------------------------------------------------------------------------------------------------------------------------------------|

# DASH Instructor Version

## T1 – Brazilian Portuguese

DASH - *Debriefing Assessment for Simulation in Healthcare* – Avaliação de *Debriefing* em Simulação Médica – Versão do Instrutor ©

**Instruções:** Faça uma auto-avaliação sobre o seu desempenho na introdução e no *debriefing* deste exercício de simulação. Utilize a seguinte escala para classificar cada um dos seis “Elementos”. Para cada Elemento, os Comportamentos são dado para indicar o desempenho positivo no Elemento em questão. Tente classificar a sua **efetividade global para cada Elemento** guiado pelos Comportamentos que o definem. Se um dos Comportamentos listados for impossível de avaliar (ex: como o instrutor lidou com pessoas aborrecidas, se ninguém esteve aborrecido), deixe o espaço em branco e não permita que isto influencie a sua avaliação. Pode ter sido bem-sucedido ou menos bem-sucedido dentro de cada Elemento. A classificação de Elemento representa a sua impressão **geral** do seu desempenho no Elemento em questão. O Elemento 1 avalia a apresentação no início do exercício de simulação. Os Elementos 2 a 6 avaliam o *debriefing*.

**Escala de classificação**

| Classificação | 1                                  | 2                                         | 3                           | 4                  | 5                    | 6                                  | 7                              |
|---------------|------------------------------------|-------------------------------------------|-----------------------------|--------------------|----------------------|------------------------------------|--------------------------------|
| Descrição     | Extremamente inefetivo/Prejudicial | Consistentemente inefetivo/Muito medíocre | Bastante inefetivo/Mediocre | Um pouco inefetivo | Bastante efetivo/Bom | Consistentemente efetivo/Muito bom | Extremamente efetivo/Excelente |

O Elemento 1 avalia a introdução no início de um exercício de simulação.  
*Ignore este elemento se não tiver participado na introdução.*

**Elemento 1**

**Classificação Elemento 1** \_\_\_\_\_

**Preparei o cenário para uma experiência envolvente de aprendizagem.**

- Apresentei-me, descrevi o ambiente do cenário, o que é esperado durante a atividade.
- Apresentei os objetivos da aprendizagem e clarifiquei questões de confidencialidade.
- Expus os pontos fortes e fracos da simulação e o que os participantes podem fazer para aproveitar ao máximo a experiência em simulação médica.

## T2 – Portuguese

DASH - *Debriefing Assessment for Simulation in Healthcare* – Avaliação do *Debriefing* em Simulação Clínica – Versão do Instrutor ©

**Instruções:** Faça uma auto-avaliação do seu desempenho na introdução e no *debriefing* deste exercício de simulação. Utilize a seguinte escala para classificar cada um dos seis “Elementos”. Para cada Elemento, os Comportamentos são referências para indicar o desempenho positivo no Elemento em questão. Tente classificar a sua **eficácia global para cada Elemento** guiado pelos comportamentos que o caracterizam. Se um dos Comportamentos listados for impossível de avaliar (ex: como o instrutor lidou com pessoas descontentes, se ninguém esteve descontente), deixe o espaço em branco e não permita que isto influencie a sua avaliação. Você pode ter sido mais, ou menos bem-sucedido dentro de cada Elemento. A classificação de Elemento representa sua impressão **geral** de seu desempenho no Elemento em questão. A classificação de Elemento representa a sua impressão **geral** do seu desempenho no Elemento em questão. O Elemento 1 avalia a introdução no início do exercício de simulação. Os Elementos 2 a 6 avaliam o *debriefing*.

**Escala de Pontuação**

| Classificação | 1                                                  | 2                                                          | 3                        | 4                          | 5                    | 6                                  | 7                                     |
|---------------|----------------------------------------------------|------------------------------------------------------------|--------------------------|----------------------------|----------------------|------------------------------------|---------------------------------------|
| Descrição     | <b>Extremamente Ineficaz/ Muito insatisfatório</b> | Consistentemente ineficaz/ Consistentemente insatisfatório | Ineficaz/ Insatisfatório | Pouco eficaz/ Satisfatório | Bastante eficaz/ Bom | Consistentemente eficaz/ Muito Bom | <b>Extremamente eficaz/ Excelente</b> |

O Elemento 1 avalia a introdução prévia ao exercício de simulação.  
*Ignore este elemento se não tiver participado na introdução.*

**Elemento 1**

**Classificação**

**Elemento 1**  
**Preparei o cenário para uma experiência de aprendizagem envolvente**

- Apresentei-me, descrevi o local do cenário e o esperado durante a atividade.
- Apresentei os objetivos da aprendizagem e clarifiquei as questões de confidencialidade.
- Expus os pontos fortes e as limitações da simulação e o que os participantes podem fazer para aproveitar ao máximo a experiência em simulação clínica.

## Review

DASH - *Debriefing Assessment for Simulation in Healthcare* – Avaliação do *Debriefing* em Simulação Clínica – Versão do Facilitador ©

**Instruções:** Faça uma autoavaliação do seu desempenho na introdução e no *debriefing* deste exercício de simulação. Utilize a seguinte escala para classificar cada um dos seis “Elementos”. Para cada Elemento, os Comportamentos são referências para indicar o desempenho positivo no Elemento em questão. Tente classificar a sua **eficácia global para cada Elemento** guiado pelos comportamentos que o caracterizam. Se um dos Comportamentos listados for impossível de avaliar (ex: como o facilitador lidou com pessoas descontentes, se ninguém esteve descontente), deixe o espaço em branco e não permita que isso influencie a sua avaliação. Pode ter sido mais, ou menos bem-sucedido dentro de cada Elemento. A classificação do Elemento representa a impressão **geral** do seu desempenho no Elemento em questão. O Elemento 1 avalia a introdução no início do exercício de simulação. Os Elementos 2 a 6 avaliam o *debriefing*.

**Escala de Pontuação**

| Classificação | 1                                           | 2                                                          | 3                        | 4                          | 5                    | 6                                  | 7                                       |
|---------------|---------------------------------------------|------------------------------------------------------------|--------------------------|----------------------------|----------------------|------------------------------------|-----------------------------------------|
| Descrição     | <b>Muito Ineficaz/ Muito insatisfatório</b> | Consistentemente ineficaz/ Consistentemente insatisfatório | Ineficaz/ Insatisfatório | Pouco eficaz/ Satisfatório | Bastante eficaz/ Bom | Consistentemente eficaz/ Muito Bom | <b>Extremamente eficaz/ Excepcional</b> |

O Elemento 1 avalia a introdução prévia ao exercício de simulação.  
*Ignore este elemento se não tiver participado na introdução.*

**Elemento 1**

**Classificação**

**Elemento 1**  
**Preparei o cenário para uma experiência de aprendizagem envolvente**

- Apresentei-me, descrevi o local do cenário e o esperado durante a atividade.
- Apresentei os objetivos da aprendizagem e clarifiquei questões de confidencialidade.
- Expus os pontos fortes e as limitações da simulação e o que os participantes podem fazer para aproveitar ao máximo a experiência em simulação clínica.

- Tive em atenção detalhes logísticos necessários, como localização da casa-de-banho, disponibilidade de alimentação e programa.
- Estimulei os participantes a partilhar os seus pensamentos e questões sobre a simulação que iria acontecer e o *debriefing* e reforcei que não iriam ser envergonhados ou humilhados durante o processo.

Os Elementos 2 a 6 avaliam o *debriefing*.

#### Elemento 2

**Classificação Elemento 2** \_\_\_\_\_

**Mantive um ambiente envolvente para a aprendizagem.**

- Esclareci o objetivo do *debriefing*, o que era esperado dos participantes e qual o meu papel no *debriefing*.
- Reconheci os problemas relacionados com o realismo e ajudei os participantes a aprender apesar de se tratar de casos simulados.
- Mostrei respeito pelos participantes.
- Assegurei-me que o objetivo principal se centrou na aprendizagem e não em fazer os participantes se sentirem mal por cometer erros.
- Estimulei os participantes a partilharem pensamentos e emoções sem medo de se sentirem envergonhados ou humilhados.

#### Elemento 3

**Classificação Elemento 3** \_\_\_\_\_

**Estruturei o *debriefing* de forma organizada.**

- Conduzi a conversa a progredir de forma lógica em vez de saltar de ponto em ponto.
- No início do *debriefing*, encorajei os participantes a partilharem as suas reações genuínas relativamente ao caso e considerei-as de forma séria.
- Durante o *debriefing*, ajudei os participantes a analisar as suas ações e pensamentos enquanto se revia o caso.
- No final, foi feito um resumo do caso onde ajudei os participantes a juntar todas as observações e relacionei o caso com diferentes formas para que eles possam melhorar a sua prática clínica futura.

#### Elemento 4

**Classificação Elemento 4** \_\_\_\_\_

**Provoquei discussões profundas que levaram os participantes a refletir sobre o seu desempenho.**

- Informei detalhes logísticos necessários, como localização dos recursos sanitários, disponibilidade de alimentação e programa.
- Estimulei os participantes a partilhar os seus pensamentos e questões sobre o caso simulado e o *debriefing*, e reforcei que não iriam ser constrangidos ou inferiorizados durante o processo.

Os Elementos 2 a 6 avaliam o *debriefing*

#### Elemento 2

**Classificação**

#### Elemento 2

**Mantive um ambiente envolvente para a aprendizagem**

- Esclareci os objetivos do *debriefing*, o que era esperado dos participantes e qual o meu papel no *debriefing*.
- Reconheci os problemas relacionados com o realismo e ajudei os participantes a aprender apesar de se tratar de casos simulados.
- Mostrei respeito pelos participantes.
- Assegurei-me que o objetivo principal se centrou na aprendizagem e não em fazer os participantes sentirem-se mal por cometer erros.
- Estimulei os participantes a partilhar pensamentos e emoções sem medo de se sentirem constrangidos ou inferiorizados.

#### Elemento 3

**Classificação Elemento 3**

**Estruturei o *debriefing* de forma organizada.**

- Conduzi a conversa progredindo de forma lógica, em vez de saltar de ponto em ponto.
- No início do *debriefing*, encorajei os participantes a partilharem as suas reações genuínas relativamente ao caso e considerei-as de forma séria.
- Durante o *debriefing*, ajudei os participantes a analisar as suas ações e pensamentos enquanto se revia o caso.
- No final, foi feito um resumo do caso onde ajudei os participantes a integrar todas as observações e relacionei o caso de diferentes maneiras para que eles possam melhorar a sua prática clínica futura.

#### Elemento 4

**Classificação**

#### Elemento 4

**Provoquei discussões profundas que levaram os participantes a refletir sobre o seu desempenho.**

- Informei detalhes logísticos necessários, como localização dos recursos sanitários, disponibilidade de alimentação e programa.
- Estimulei os participantes a partilhar pensamentos e questões sobre o caso simulado e o *debriefing*, e reforcei que não iriam ser constrangidos ou inferiorizados durante o processo.

Os Elementos 2 a 6 avaliam o *debriefing*

#### Elemento 2

**Classificação**

#### Elemento 2

**Mantive um ambiente envolvente para a aprendizagem**

- Esclareci os objetivos do *debriefing*, o que era esperado dos participantes e qual o meu papel no *debriefing*.
- Reconheci os problemas relacionados com o realismo e ajudei os participantes a aprender apesar de se tratarem de casos simulados.
- Mostrei respeito pelos participantes.
- Assegurei-me que o objetivo principal se centrou na aprendizagem e não em fazer com que os participantes se sentissem mal por cometerem erros.
- Estimulei os participantes a partilharem pensamentos e emoções sem medo de se sentirem constrangidos ou inferiorizados.

#### Elemento 3

**Classificação Elemento 3**

**Estruturei o *debriefing* de forma organizada.**

- Conduzi a conversa de forma lógica, em vez de saltar de ponto em ponto.
- No início do *debriefing*, incentivei os participantes a partilharem as suas reações genuínas relativamente ao caso e considerei-as de forma séria.
- Durante o *debriefing*, ajudei os participantes a analisar as suas ações e pensamentos enquanto se revia o caso.
- No final, foi feito um resumo do caso onde ajudei os participantes a integrar todas as observações e abordei o caso de diferentes maneiras para que eles possam melhorar a sua prática clínica futura.

#### Elemento 4

**Classificação**

#### Elemento 4

**Promovi discussões que levaram os participantes a refletir sobre o seu desempenho.**



- Utilizei exemplos concretos – não apenas comentários abstratos e generalizados – para que os participantes pudessem pensar sobre o seu desempenho.
- O meu ponto de vista foi claro; não forcei os participantes a terem que adivinhar o que eu estaria a pensar.
- Ouvi e fiz com que os participantes se sentissem ouvidos ao tentar incluir todos, interpretar os comentários e utilizar linguagem não-verbal, como contacto visual e acenar com a cabeça, etc.
- Utilizei vídeos ou dados gravados para apoiar a análise e aprendizagem (Quando disponível).
- Se alguém ficou aborrecido no *debriefing*, fui respeitador e construtivo ao tentar ajudá-lo a lidar com a situação.

#### Elemento 5

##### Classificação Elemento 5 \_\_\_\_\_

#### Identifiquei o que fizeram bem e mal – e porquê.

- Realizei comentários concretos sobre o desempenho dos participantes ou do grupo baseados em declarações objetivas e no meu ponto de vista honesto.
- Ajudei os participantes a explorar o que estavam a pensar ou o que tentavam alcançar nos momentos-chave.

#### Elemento 6

##### Classificação Elemento 6 \_\_\_\_\_

#### Ajudei os participantes a perceber como podem melhorar ou manter seu bom desempenho.

- Ajudei os participantes a aprender como podem melhorar áreas de fraqueza ou como repetir um bom desempenho.
- Usei os meus conhecimentos e experiências para ajudar os participantes a perceber como podem desenvolver um bom desempenho no futuro.
- Garanti que todos os pontos importantes foram abordados.
- 

Direitos Autorais. *Center for Medical Simulation*, [www.harvardmedsim.org](http://www.harvardmedsim.org), 2011.

- Utilizei exemplos concretos – não apenas comentários abstratos e generalizados – para que os participantes pudessem refletir sobre o seu desempenho.
- O meu ponto de vista foi claro; não forcei os participantes a adivinhar o meu pensamento.
- Ouvi e fiz com que os participantes se sentissem ouvidos ao incluir todos da discussão, interpretar os comentários e utilizar linguagem não-verbal, como olhar nos olhos dos participantes ou acenar com a cabeça.
- Utilizei vídeos ou dados gravados para apoiar a análise e aprendizagem (quando disponível).
- Se alguém ficou descontente com o *debriefing*, fui respeitador e construtivo ao tentar ajudá-lo a lidar com a situação.

#### Elemento 5

##### Classificação

#### Elemento 5

#### Identifiquei o que fizeram melhor e pior – e porquê.

- Realizei comentários concretos sobre o desempenho dos participantes e/ou do grupo baseados em declarações objetivas e no meu ponto de vista honesto.
- Ajudei os participantes a explorar o que pensavam ou o que tentavam alcançar nos momentos-chave.

#### Elemento 6

##### Classificação

#### Elemento 6

#### Ajudei os participantes a perceber como podem melhorar ou manter um bom desempenho.

- Ajudei os participantes a aprender como podem melhorar deficiências ou como repetir um bom desempenho.
- Usei o meu conhecimento e experiência para ajudar os participantes a perceber como podem melhorar o seu desempenho no futuro.
- Garanti que todos os pontos importantes foram abordados.

Direitos Autorais. *Center for Medical Simulation*, [www.harvardmedsim.org](http://www.harvardmedsim.org), 2011.

- Utilizei exemplos concretos – não apenas comentários abstratos e generalizados – para que os participantes pudessem refletir sobre o seu desempenho.
- O meu ponto de vista foi claro; não forcei os participantes a adivinhar o meu pensamento.
- Ouvi e fiz com que os participantes se sentissem ouvidos ao incluir todos na discussão, interpretar os comentários e utilizar linguagem não verbal, como olhar nos olhos dos participantes ou acenar com a cabeça.
- Utilizei vídeos ou dados gravados para apoiar a análise e aprendizagem (quando disponível).
- Se alguém ficou descontente com o *debriefing*, fui respeitador e construtivo ao tentar ajudá-lo a lidar com a situação.

#### Elemento 5

##### Classificação

#### Elemento 5

#### Identifiquei o que fizeram melhor e pior – e por que.

- Realizei comentários concretos sobre o desempenho dos participantes e/ou do grupo baseados em declarações objetivas e no meu ponto de vista.
- Ajudei os participantes a explorar o que pensavam ou o que tentavam alcançar nos momentos chave.

#### Elemento 6

##### Classificação

#### Elemento 6

#### Ajudei os participantes a perceber como podem melhorar ou manter um bom desempenho.

- Ajudei os participantes a aprenderem como podem melhorar deficiências ou como repetir um bom desempenho.
- Usei o meu conhecimento e experiência para ajudar os participantes a perceber como podem melhorar o seu desempenho no futuro.
- Garanti que todos os pontos importantes foram abordados.

Direitos Autorais. *Center for Medical Simulation*, [www.harvardmedsim.org](http://www.harvardmedsim.org), 2011.
