# Supplementary material for: Translation of the Debriefing Assessment for Simulation in Healthcare in Portuguese and cross-cultural adaptation for Portugal and Brazil
Source: PubMed Central journal article supplement (PMC8265112; doi:10.1186/s41077-021-00175-z), 2021-07-07
Supplement: 41077_2021_175_MOESM7_ESM.pdf [file 41077_2021_175_MOESM7_ESM.pdf]

Supplemental Table . Conflicts detected between DASH and Back Translation of Elements 2 and 5.

| Conflict detected between Back translation and original document (DASH) |                                                                |                                                                    | Category of the conflict | Origin of the conflict | Result    |
|-------------------------------------------------------------------------|----------------------------------------------------------------|--------------------------------------------------------------------|--------------------------|------------------------|-----------|
| Back Translation                                                        | Original (DASH)                                                | Portuguese                                                         |                          |                        |           |
| Efficient                                                               | Effective                                                      | Eficaz                                                             | Term                     | Back translation       | No change |
| Inefficiency                                                            | Ineffective                                                    | Ineficaz                                                           | Term                     | Back translation       | No change |
| Justifying                                                              | Adjusting                                                      | Se ajustar                                                         | Term                     | Back translation       | No change |
| Do not notice (or feel)                                                 | Don't appreciate (or resent)                                   | Não apreciam (ou ressentem-se)                                     | Term                     | Back translation       | No change |
| Limited realism is confused with a problem of solving process.          | Limited realism confounds their problem-solving process        | Limitação do realismo confunde o processo de resolução do problema | Syntax                   | Portuguese             | Change    |
| Discomfort                                                              | Awkwardness                                                    | Estranheza                                                         | Term                     | Back translation       | No change |
| To help in the creation of a context of informal conversation           | Helps create a context conducive to the conversational probing | Ajuda a criar um contexto de conversa informal                     | Concept                  | Portuguese             | Change    |
| Communicate on this regard                                              | Communicating such respect                                     | Comunicar esse respeito                                            | Term                     | Portuguese             | Change    |
| Nervous                                                                 | Hot-headed                                                     | Cabeça quente                                                      | Term                     | Back translation       | No change |
| Doing                                                                   | To make                                                        | Fazer                                                              | Term                     | Back translation       | No change |
| Structure                                                               | Frame                                                          | Estruturas                                                         | Concept                  | Portuguese             | Change    |
| Not consistent                                                          | Falls short                                                    | Está aquém                                                         | Term                     | Back translation       | No change |

|                                                                   |                                                        |                                                       |         |                  |           |
|-------------------------------------------------------------------|--------------------------------------------------------|-------------------------------------------------------|---------|------------------|-----------|
| Providing feedback about positive not about negative performance. | Commenting on positive as well as negative performance | Comentar no desempenho positivo e não só no negativo. | Syntax  | Portuguese       | Change    |
| Did not report                                                    | Does not want to say                                   | Não quer dizer                                        | Term    | Back translation | No change |
| Different                                                         | Distinctive                                            | Distinta                                              | Term    | Portuguese       | Change    |
| Movement                                                          | Driving force                                          | Força motriz                                          | Term    | Portuguese       | Change    |
| Throughout the character playing                                  | At the time                                            | Durante o cenário                                     | Concept | Back translation | No change |
| Correct actions.                                                  | Correcting actions                                     | Corrigir as ações                                     | Term    | Back translation | No change |
| Establishing the hypothesis                                       | Sneering at a trainee's assumptions                    | Desdenhar hipóteses dos participantes                 | Term    | Back translation | No change |

Table 2 - (Created from the above table)

19 discrepancies were found distributed as follows:

- 14 (73.6%) related to a Term
- 2 (10.5%) related to Syntax
- 3 (15.8%) related to a Concept

12 (63.2%) discrepancies were seen as originated in the Back Translation and, therefore, did not incur in any necessary changes to the Consensus Harmonized Translation.

- 7 (31.6%) discrepancies were seen as originated in the Forward Translation and that prompted to necessary changes
